## **Validating Minimally Invasive Laser Doppler Flowmetry for Serial Bone Perfusion Measurements in Mice**

Nicholas J. Hanne<sup>a,1</sup>, Elizabeth D. Easter<sup>b,1</sup>, Jacqueline H. Cole<sup>a,\*</sup>

<sup>1</sup> These authors contributed equally to this work.

<sup>a</sup> Joint Department of Biomedical Engineering, University of North Carolina, Chapel Hill, NC, and North Carolina State University, Raleigh, NC, USA

<sup>b</sup> Materials Science and Engineering, North Carolina State University, Raleigh, NC, USA

### **\*Corresponding Author:**

Jacqueline H. Cole

Joint Department of Biomedical Engineering

University of North Carolina and North Carolina State University

911 Oval Drive

Campus Box 7115

Raleigh, NC 27695-7115

Tel: 919-515-5955

Fax: 919-513-3814

[jacquecole@ncsu.edu](mailto:jacquecole@ncsu.edu)

## Highlights

- Modified, minimally invasive laser Doppler flowmetry (LDF) technique was validated for serial measures of tibial perfusion in mice.
- Weekly LDF procedures did not induce inflammation or alter gait patterns that could confound metrics of interest in bone studies.
- Ligation of the femoral artery confirmed the LDF technique measures functional perfusion within the bone.

## Abstract

*In vivo* laser Doppler flowmetry (LDF) has previously been used to quantify blood perfusion accurately at a single timepoint in the murine tibial metaphysis. However, this procedure entailed substantial disruption to soft tissues overlying the bone and caused notable localized inflammation for several weeks after the procedure, impeding serial measurements in the same mouse. In this study, we tested a less invasive technique to measure perfusion in the tibia with LDF and validated that it can be used serially in the same mouse without causing inflammation or gait perturbations. Twenty 14-week-old C57Bl/6J mice were evenly divided into groups that either had daily treadmill exercise or remained sedentary. Within these activity groups, mice were evenly subdivided into groups that received LDF measurements either weekly or only once at the study endpoint. Bone perfusion was measured with LDF in the anteromedial region of the right tibial metaphysis. Serum concentrations of interleukin 6, incision site wound area, and interlimb coordination during gait were measured weekly for four weeks. Tibial perfusion did not differ significantly between exercise and sedentary groups within the weekly or endpoint-only LDF groups at any timepoint. Perfusion was significantly increased in the third week in the weekly LDF group relative to measurements in the second and fourth weeks. Ligation of the femoral artery caused consistent, rapid reductions in tibial perfusion, validating that LDF is sensitive to changes in tibial blood supply. Weekly LDF procedures did not adversely affect gait, as interlimb coordination during treadmill locomotion was similar between weekly and endpoint-only LDF groups at every timepoint. Images of the incision site show wound closure within one week, and serum concentrations of interleukin 6 were not significantly different between weekly and endpoint-only groups. Together, these findings demonstrate that our minimally invasive LDF technique can be

used for serial *in vivo* measurements of intraosseous blood perfusion without inducing localized inflammation or negatively affecting gait patterns in mice.

**Keywords:**

laser Doppler flowmetry, bone blood perfusion, vascular supply, minimally invasive, serial measurement, *in vivo*

**Abbreviations:**

LDF – laser Doppler flowmetry

## 1 **1. Introduction**

2 Vasculature within bone (*osteovasculature*) is an essential contributor to bone health,  
3 providing nutrients, oxygen, cells, and chemical signals and removing waste products [1,2].  
4 Adequate vascular perfusion is required for bone development, adaptation in response to loading,  
5 and healing after fracture [2–4]. Evidence that vascular pathologies are associated with bone loss  
6 is growing. Aortic calcification is associated with decreased lumbar spine bone mineral density  
7 (BMD) and increased fracture risk in men and women within four years [5], and the incidence of  
8 cardiovascular disease increases with reduced BMD in the spine in white men, and hip, trochanter,  
9 and femoral neck in black women [6]. Osteoporosis is associated with reduced perfusion in the  
10 vertebrae for men [7] and in the femoral head for women [8], although the mechanisms responsible  
11 for bone loss in these individuals is unknown and needs further examination using animal studies.  
12 Although murine models are commonly used to determine the effect of pathologies on bone  
13 properties, measuring blood perfusion within mouse bone is complicated due to their small size.  
14 Current methods are either experimentally difficult (e.g., hydrogen washout [9]) or require the  
15 animal to be sacrificed (e.g., microspheres, radiolabels, polyoxometalates, barium sulfate, or  
16 Microfil<sup>®</sup> [10–16]). Some methods can be performed *in vivo* but provide poor resolution not  
17 suitable for small bones: laser speckle imaging [17], laser Doppler perfusion imaging [18],  
18 contrast-enhanced magnetic resonance imaging (MRI) [19], contrast-enhanced positron emission  
19 tomography (PET) [19], and contrast-enhanced micro-computed tomography [20,21]. Endpoint  
20 and *ex vivo* measurements only provide a snapshot of vascular network function, missing the  
21 timing of vascular changes and any transient changes to vascular supply. A technique that could  
22 be used for longitudinal studies of bone perfusion *in vivo* would enable us to capture temporal

23 changes in bone perfusion for individual subjects, thereby improving understanding of disease  
24 progression and intervention effectiveness.

25 First proposed as a tool to measure intraosseous perfusion by Nilsson *et al.* in 1980 [22],  
26 laser Doppler flowmetry (LDF) directs a monochromatic light source over a perfused tissue and  
27 measures backscattered light from fluid movement with a photodetector to provide a relative  
28 measure of blood perfusion. Perfusion is a functional measure of blood flow that is affected not  
29 only by the amount and velocity of red blood cells but also capillary density, vascular permeability,  
30 and flow direction [23,24]. LDF was first used to measure blood perfusion in the cancellous bone  
31 of pig mandibles by Hellem *et al.* in 1983 [25] and thereafter was rapidly adopted in orthopaedic  
32 clinics as an intraoperative tool to aid surgeons in identifying non-viable bone for debridement in  
33 patients with osteomyelitis, osteonecrosis of the femoral head, and lower limb traumatic injury  
34 [23]. LDF has also been used as an endpoint measure to compare relative intraosseous perfusion  
35 between groups in murine research studies [26,27]. Recently, it was validated as a tool to quantify  
36 perfusion in the mouse tibia, but the technique used in that study involved a relatively large incision  
37 that resulted in inflammation at the incision site up to three months after the procedure [28]. To  
38 monitor longitudinal changes in murine bone perfusion, a less invasive LDF procedure is needed  
39 that will not induce significant localized inflammation or limping during gait, which could have  
40 both biological and mechanical confounding effects on bone.

41 We developed a minimally invasive LDF procedure and have used it to measure changes in  
42 tibial perfusion in mice in response to diet-induced obesity, ischemic stroke, and treadmill exercise  
43 [29,30]. The objective of this study was to determine if this modified LDF procedure could be  
44 performed repeatedly in a longitudinal study without affecting bone perfusion, inducing  
45 inflammation, or altering limb coordination during locomotion, which could confound bone

46 metrics of interest and perfusion changes associated with interventions. Developing new *in vivo*  
47 techniques to measure bone blood perfusion is a critical step needed to understand longitudinal  
48 changes to osteovasculature, which may contribute to bone loss occurring during progression of  
49 various clinical pathologies.

50

## 51 **2. Materials and Methods**

### 52 2.1 Study design

53 The protocol for this study was approved by the Institutional Animal Care and Use  
54 Committee at North Carolina State University. Eighteen 14-week-old male C57Bl/6J mice (The  
55 Jackson Laboratory, Bar Harbor, ME) were acclimated to the animal facility for one week. They  
56 were group-housed (4 per cage) on a 12-hour light/12-hour dark diurnal cycle and provided chow  
57 and water *ad libitum*. The mice were randomly assigned to four groups (Fig. 1) based on LDF  
58 procedure frequency (weekly, endpoint) and exercise regimen (sedentary, exercise): weekly  
59 sedentary (n = 5), weekly exercise (n = 5), endpoint sedentary (n = 4), and endpoint exercise (n =  
60 4). Exercise groups were acclimated to treadmill exercise (Exer-3/6, Columbus Instruments,  
61 Columbus, OH) by increasing exercise intensity for 2 days prior to the start of the study (Day 1: 5  
62 m/min for 10 min, 9 m/min for 10 min, and 12 m/min for 10 min; Day 2: 5 m/min for 5 min, 9  
63 m/min for 5 min, and 12 m/min for 20 min). During the study, exercise groups performed daily  
64 exercise for 4 weeks (30 min/day, 5 days/week, 12 m/min, 5° incline), while sedentary groups  
65 were placed on a stationary treadmill for the same amount of time to equalize handling among the  
66 groups.

67 Laser Doppler flowmetry was used to measure intraosseous blood perfusion in the right tibial  
68 metaphysis, performed either weekly for 4 weeks (weekly groups) or at a single timepoint at the

69 end of the study (endpoint groups). For the weekly LDF groups, starting in Week 2, images of the  
70 incision site were taken during the LDF procedure prior to making an incision to assess the wound  
71 from the previous week. Blood samples were collected from the submandibular vein of all mice  
72 under anesthesia (at the end of the LDF procedure for the weekly groups). Blood samples were  
73 centrifuged at 2,000 x g for 10 min, and the isolated serum was stored at -80°C until analysis with  
74 an enzyme-linked immunosorbent assay (ELISA). At five days after each of the first three LDF  
75 procedures, gait patterns were assessed using high-speed video. Immediately following the last  
76 LDF procedure and serum collection, mice were euthanized using CO<sub>2</sub> asphyxiation followed by  
77 cervical dislocation.

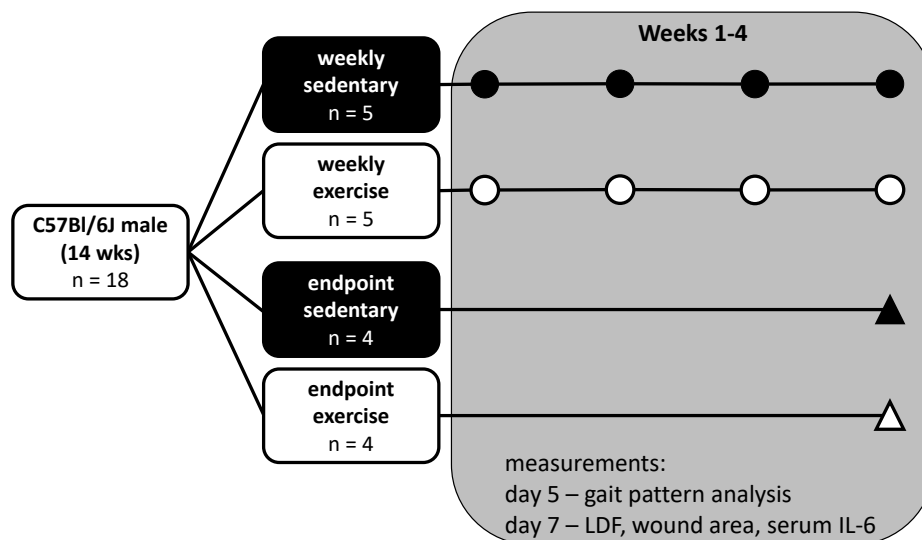

**Figure 1.** Experimental design. Symbols indicate weeks in which tibial perfusion was measured with LDF. Wound area, serum interleukin 6 (IL-6), and gait patterns were assessed weekly.

78

79

## 80 2.2 Tibial perfusion

81 All mice were fasted for 6-8 hours before each LDF procedure. Anesthesia was induced and

82 maintained with isoflurane (2%) in pure oxygen throughout the procedure (about 15 minutes).

83 After anesthesia induction, the fur over the right knee was shaved, mice were placed supine on a



84 heated pad, and the right leg was taped to the surgical platform. A 2-5-mm long incision was made  
85 over the anteromedial surface of the right proximal tibial metaphysis, the bone was exposed, and  
86 a small region of the periosteum was scraped away. LDF measurements were recorded using an  
87 LDF monitor with a 785-nm light source (MoorVMS-LDF, Moor Instruments Ltd, Axminster,  
88 UK), and a 3 kHz lowpass filter selected. A VP4 Needle Probe (0.8 mm outer diameter, 0.25 mm  
89 fiber separation) was placed directly on the exposed bone surface (Fig. 2) and held in place using  
90 a micromanipulator (MM3-ALL, World Precision Instruments, Sarasota, FL) to reduce signal  
91 noise from probe movement. Each weekly measurement was composed of the weighted mean and  
92 standard deviation of three 30-second readings, with repositioning of the probe between readings.  
93 The incisions were closed using VetBond™ tissue glue (3M Company, St. Paul, MN) and covered  
94 with triple antibiotic cream.

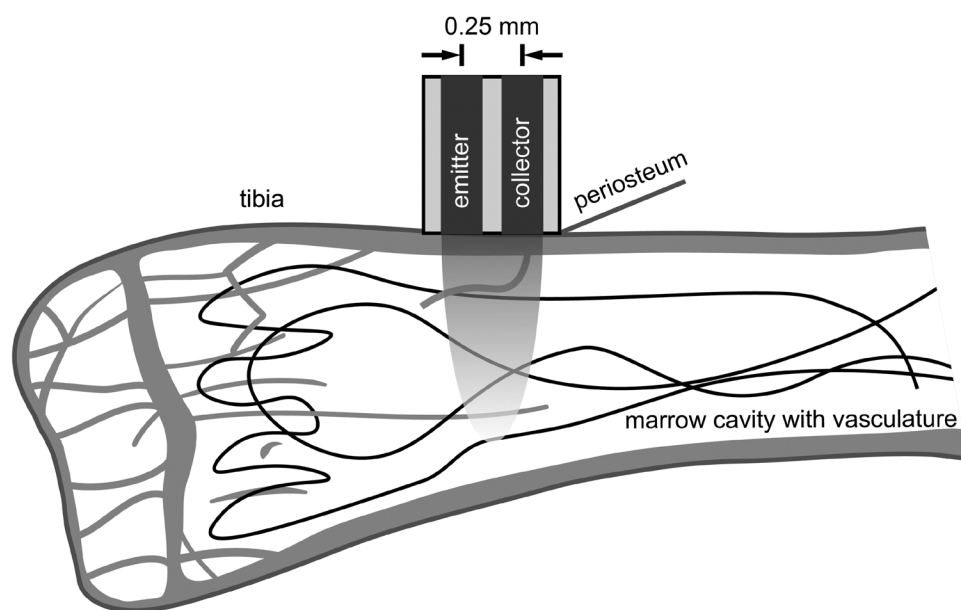

**Figure 2.** Schematic of LDF setup for bone perfusion measurements in the proximal tibia. The probe, placed on the tibial surface, emitted 785-nm light that scattered through a region of underlying tissue (represented by parabolic shading) and experienced Doppler shifts, some of which was scattered back to the collection probe, where it was measured.

95

96

### 97 2.3 Femoral ligation validation

98 At the end of the study, just prior to euthanasia, additional LDF measurements were  
99 performed in a subset of mice (n=12) during arterial ligation to confirm the association of LDF  
100 perfusion measurements with changes in blood supply to the bone. While still anesthetized during  
101 the final LDF procedure, the skin incision over the proximal tibia was extended to expose the entire  
102 inner thigh and the femoral artery. The LDF probe was again positioned over the tibial metaphysis,  
103 and a suture was tied around the femoral artery but not tightened. A 30-second baseline  
104 measurement was taken, the suture was tightened to ligate the artery, and another 30-second  
105 measurement was recorded. The reduction in tibial perfusion was calculated as the ratio of the  
106 ligated measurement to the baseline measurement, expressed as a percent.

107

### 108 2.4 Wound area

109 As mentioned above, for the weekly LDF groups, pictures were taken of the incision wounds  
110 immediately prior to each LDF procedure to assess localized inflammation and healing at the  
111 wound site from the procedure performed in the preceding week. Wound area was calculated by  
112 tracing the edge of the wound in ImageJ (version 1.51k, National Institutes of Health, Bethesda,  
113 MD). The wound was considered closed if no moist granulation tissue was visible and the wound  
114 was covered with new epithelium [31].

115

### 116 2.5 Serum concentration of interleukin 6

117 Systemic inflammation was examined by quantifying serum concentrations of the  
118 proinflammatory marker interleukin 6 (IL-6) with an ELISA (IL-6 Mouse ELISA kit, KMC0061,  
119 Invitrogen, Carlsbad, CA). Samples were prepared according to the manufacturer's instructions

120 and measured using a plate reader (Synergy H1, BioTek Instruments, Inc., Winooski, VT). Due to  
121 limited serum, some samples were diluted 2-4 times to allow samples to be run in duplicate.

122

## 123 2.6 Gait pattern analysis

124 The effect of the LDF procedures on interlimb coordination was examined weekly in all  
125 mice, five days after each procedure day, because limping or other gait asymmetries could alter  
126 the strain experienced by hindlimb bones and confound bone outcome measures [32]. During a  
127 short treadmill session (12 m/min for 60 sec), high-speed video was collected in the sagittal plane  
128 at 240 frames per second (HERO4, GoPro, Inc., San Mateo, CA). Gait was analyzed using Kinovea  
129 (version 0.8, Kinovea Open Source Project) to quantify duty cycle for both hindlimbs and phase  
130 dispersions for ipsilateral, diagonal, and contralateral limbs with relation to the LDF limb (right  
131 hindlimb) (Fig. 3) [33–35]. Duty cycle for a given limb is the ratio of the time that limb is on the  
132 ground (measured from paw strike to lift off) to the total time of an entire gait cycle (measured  
133 from paw strike to paw strike). Phase dispersion between two limbs is a measure of the time  
134 between paw strikes for those two limbs within a gait cycle. Five consecutive gait cycles were  
135 analyzed for each treadmill session. Duty cycle and phase dispersion were averaged over the five  
136 gait cycles at each timepoint.

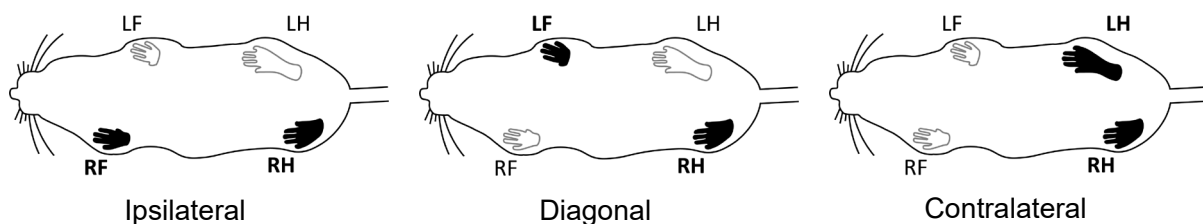

**Figure 3.** Schematic of the ipsilateral (RF-RH), diagonal (LF-RH), and contralateral (LH-RH) phase dispersions used for gait analysis. Relevant limbs relative to the LDF limb (RH) shaded in black. L=left, R=right, F=forelimb, H=hindlimb.

137

138

## 139 2.7 Statistical analysis

140 All data analyses were performed using SAS (SAS University Edition v. 9.4, SAS Institute  
141 Inc., Cary, NC) with a significance level of 0.05. Models were chosen to answer five questions: 1)  
142 Does performing weekly LDF procedures affect bone perfusion? To answer this question, LDF  
143 data from the final timepoint (Week 4) were compared across LDF frequency (weekly, endpoint)  
144 and exercise regimen (sedentary, exercise) using a two-way ANOVA with interaction. Tukey's  
145 post-hoc tests were used to compare group means. 2) Does exercise affect bone perfusion? For this  
146 question, LDF data for the weekly group were compared across exercise regimen and timepoint  
147 (Weeks 1-4) to examine differences between exercise groups within each timepoint (i.e., sedentary  
148 vs. exercise at Week 1). A mixed effects general linear model (procedure MIXED) with interaction  
149 was used, with exercise group as a fixed factor and timepoint as a repeated factor. The covariance  
150 matrix was modeled using compound symmetry. Exercise effect differences were calculated based  
151 on least squares means (LSM) with Tukey-Kramer adjustments for multiple comparisons. For the  
152 endpoint-only group (Week 4 data), the effect of exercise was examined with one-way ANOVA.  
153 3) Do weekly LDF procedures alter exercise effects on bone perfusion? Effect differences between  
154 timepoints (i.e., Week 1 vs. Week 2) were evaluated in the same mixed effects model using LSM  
155 with Tukey-Kramer adjustments for multiple comparisons. 4) Do LDF readings directly  
156 correspond to changes in blood supply, assessed by femoral artery ligation? LDF data before and  
157 after the femoral artery was ligated were compared using a paired t-test. 5) Do weekly LDF  
158 procedures alter gait and interlimb coordination? This question was addressed by comparing gait  
159 parameters between LDF groups within exercise groups and timepoints (i.e., weekly sedentary vs.  
160 endpoint sedentary at Week 1). Four gait parameters were compared across LDF groups, exercise  
161 groups, and timepoints (Weeks 2-4) with mixed effects linear models (procedure MIXED) with

162 interaction, where LDF frequency and exercise regimen were fixed factors and timepoint was a  
163 repeated measure. The covariance matrices were modeled using either compound symmetry (duty  
164 cycle, contralateral phase dispersion) or a first-order autoregressive (diagonal and ipsilateral phase  
165 dispersion), based on which covariance matrix yielded a lower corrected Akaike's Information  
166 Criterion. Effect differences were calculated based on LSM with Tukey-Kramer adjustments for  
167 multiple comparisons. All data are presented as mean  $\pm$  standard deviation, except LDF and gait  
168 data, which are presented as LSM  $\pm$  95% confidence interval.

169

### 170 **3. Results**

#### 171 3.1 Tibial perfusion

172 At Week 4, bone perfusion was similar between the weekly and endpoint-only groups ( $p =$   
173 0.92), showing that our modified LDF procedure can be performed weekly without affecting  
174 perfusion, the primary outcome of interest (Fig. 4). With weekly LDF procedures, treadmill  
175 exercise did not affect perfusion measurements, compared to the sedentary group, at any timepoint  
176 ( $p = 0.11$  Week 1,  $p = 0.64$  Week 2,  $p = 0.76$  Week 3, and  $p = 0.78$  Week 4). Similarly, with  
177 endpoint-only LDF procedures, perfusion also did not differ significantly between exercise and  
178 sedentary groups at Week 4 ( $p = 0.49$ ), suggesting weekly LDF procedures did not mask an  
179 exercise effect on perfusion. Perfusion was higher in Week 3 compared to Weeks 2 and 4,  
180 indicating that the technique is sensitive to transient perfusion changes regardless of exercise.

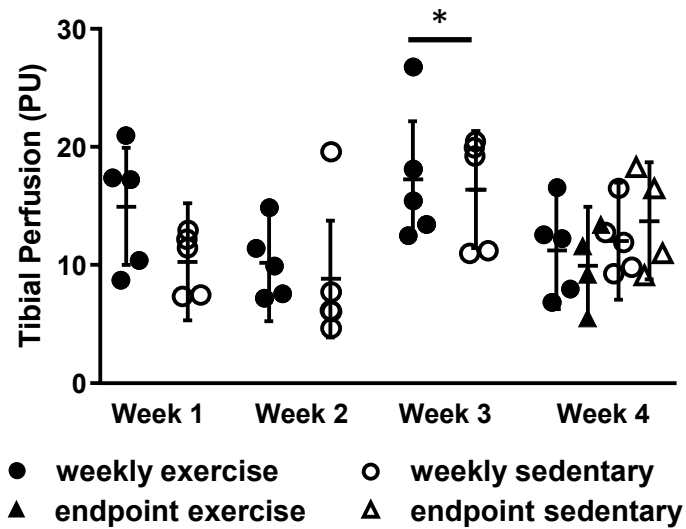

**Figure 4.** At Week 4, tibial perfusion was similar between weekly and endpoint-only groups. Sedentary and exercise groups had similar perfusion at every timepoint. LDF was sensitive to transient perfusion changes, measuring higher in Week 3 compared to Week 2 and Week 4. PU = perfusion units. Data presented as least squares mean  $\pm$  95% confidence interval. \* $p < 0.05$  vs. Weeks 2 and 4.

181

182

### 183 3.2 Femoral ligation validation

184 After the femoral artery was ligated, perfusion in the tibia dropped rapidly from  $15.3 \pm 9.2$   
185 perfusion units (PU) to  $3.8 \pm 1.4$  PU within 30 seconds ( $31 \pm 19\%$  of the baseline perfusion,  $p =$   
186  $0.004$ ) (Fig. 5), validating that the LDF perfusion measurements are directly associated with blood  
187 supply within the bone. Two measurements were not included in the analysis, because the LDF  
188 probe slipped off the tibia when the ligature was tightened.

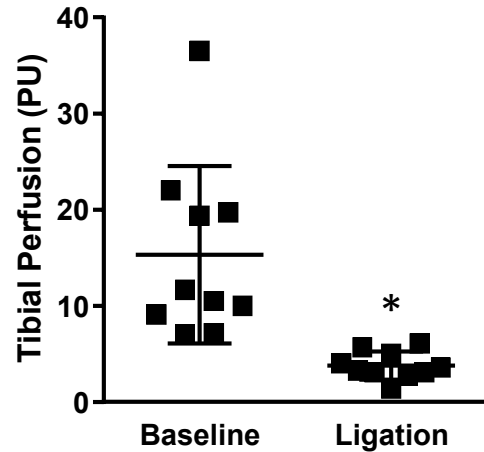

**Figure 5.** After ligation of the femoral artery, tibial perfusion dropped to  $31 \pm 19\%$  of the baseline value. PU = perfusion units. \* $p < 0.05$  vs. baseline.

189

190

### 191 3.3 Wound area

192 Wound images taken one week after each weekly LDF procedure showed minimal signs of

193 inflammation for all but one incision for both exercise and sedentary mice, with either full closure

194 (Fig. 6A) or a small, dry scab (Fig. 6B) resulting in zero wound area recorded. Wet granulation

195 tissue was observed in only one incision site, for a sedentary mouse in Week 2 (Fig. 6C, wound

196 area =  $0.39 \text{ mm}^2$ ), and the wound was healed within the subsequent week.

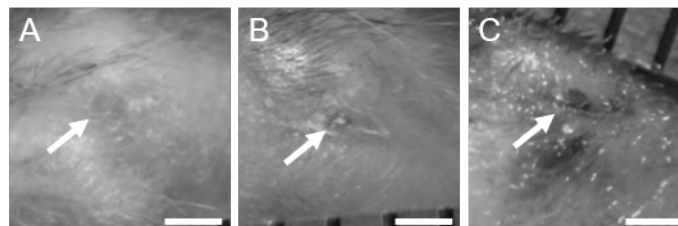

**Figure 6.** Example images of the incision wound site (arrows) from the weekly LDF group taken one week following the procedure. Incisions were either A) fully closed or B) closed with small, dry granulation tissue. C) Only one incision did not fully heal, but it was healed by the following week. Scale bars are 1 mm.

197

198

### 199 3.4 Serum concentration of IL-6

200 Circulating levels of proinflammatory marker IL-6 were below the detectable limit for all animals  
201 at each timepoint, except one mouse in the endpoint sedentary group at Week 4 (52.1 pg/mL).  
202 Since the lower threshold of the test is 7.8 pg/mL, and serum samples were diluted up to four times  
203 to allow for duplicate measurements, serum levels of IL-6 were below 31.2 pg/mL. These levels  
204 agree with normal physiologic concentrations of IL-6, which are below 100 pg/mL in C57Bl/6J  
205 mice [36,37], suggesting the mice in our study experienced little to no systemic inflammation in  
206 response to the weekly LDF procedures. Pathologic inflammation can increase IL-6 levels up to  
207 200-1,000 pg/mL [36,37]

208

### 209 3.5 Gait pattern analysis

210 Weekly LDF procedures did not affect gait parameters during treadmill locomotion. Limb  
211 coordination did not differ between weekly and endpoint-only groups at any timepoint for either  
212 sedentary or exercise groups (Fig. 7). Sedentary groups did have small alterations in gait  
213 parameters in Week 2 compared to exercise groups (hindlimb duty cycle and diagonal and  
214 contralateral phase dispersion), possibly indicating slight discomfort or unfamiliarity with  
215 treadmill locomotion. Diagonal phase dispersion was lower in exercise mice compared to  
216 sedentary during Week 4 (8.6% lower,  $p = 0.012$ ).

217



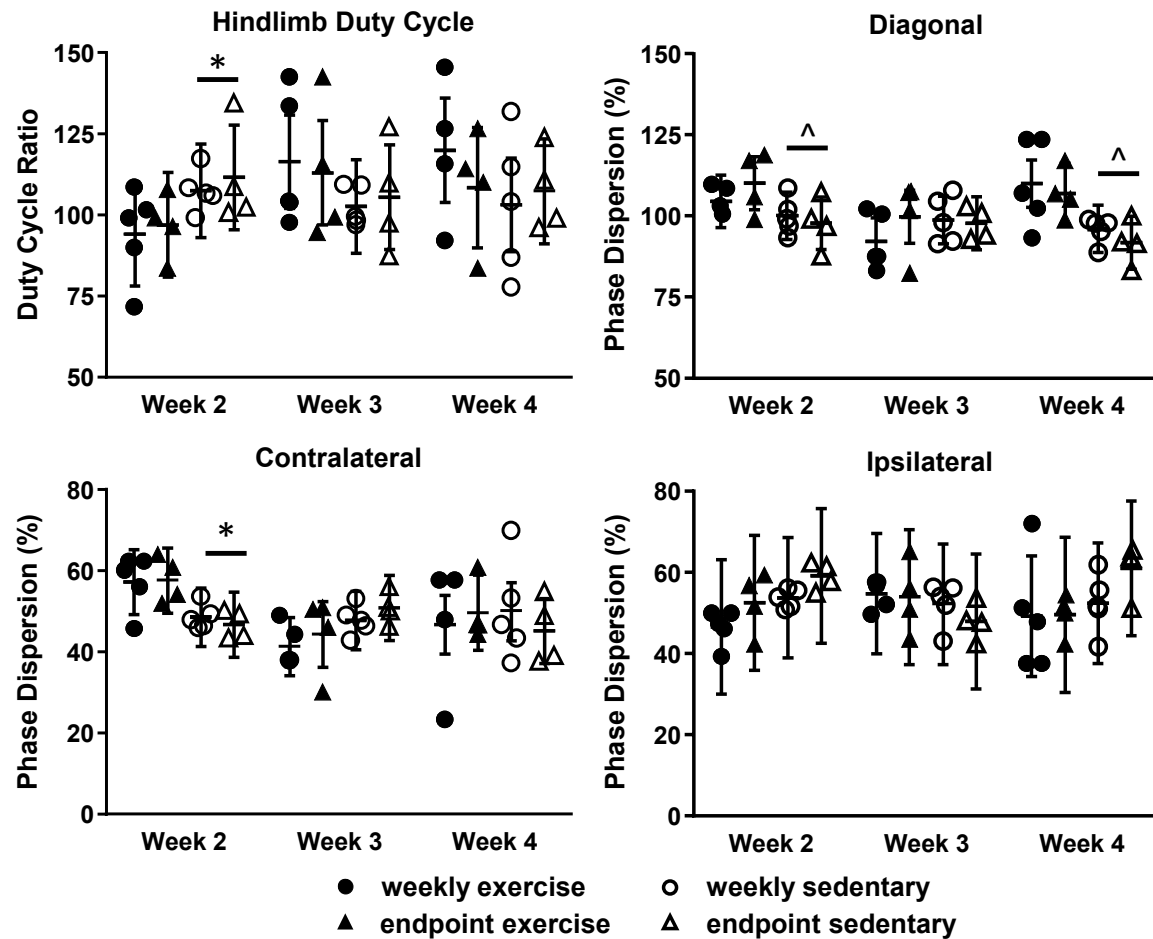

**Figure 7.** Treadmill locomotion patterns involving the LDF affected limb (right hindlimb). Gait patterns were not significantly different between weekly and endpoint-only groups at any timepoint for hindlimb duty cycle ratio (A), diagonal phase dispersion (B), contralateral phase dispersion (C), or ipsilateral phase dispersion (D). Diagonal and contralateral phase dispersion were lower in exercise than sedentary groups at some timepoints. Data are presented as least squares mean  $\pm$  95% confidence interval. \* $p < 0.05$  vs. sedentary. ^  $p = 0.066$  vs. sedentary.

218

219

#### 220 4. Discussion

221 Our minimally invasive laser Doppler flowmetry technique measured *in vivo* intraosseous  
 222 perfusion in the tibia weekly without inducing localized or systemic inflammation. LDF measures  
 223 of tibial perfusion were similar between groups that received weekly procedures and groups that  
 224 received only an endpoint procedure, indicating that the procedure itself did not impact  
 225 measurements of intraosseous perfusion. A previous study demonstrated that LDF could be used

226 to quantify blood perfusion in murine tibiae but noted that signs of inflammation were observed at  
227 the incision site up to three months following the procedure and suggested that it be used as an  
228 endpoint-only measure to avoid influencing bone outcomes [28]. In this study, we limited the  
229 invasiveness of the procedure by reducing the incision size and preserving muscle tissue, thereby  
230 enabling repeated measurements to be performed without causing chronic increases in  
231 proinflammatory marker IL-6. Furthermore, all but one incision from the procedures were fully  
232 closed within the one-week period before the next procedure, and no visual signs of inflammation  
233 were observed throughout the study. The fast healing times observed in the small incisions from  
234 this procedure (approximately 1 mm) are consistent with wound closure studies, where even large  
235 (9-28 mm<sup>2</sup>), unclosed dermal biopsies heal in 7-14 days [38].

236 The femoral ligation test confirmed that LDF measures are sensitive to changes in blood  
237 supply and thus are directly related to perfusion within the underlying cortical bone and marrow  
238 space. We demonstrated that femoral artery ligation reliably decreased the measured perfusion to  
239 about 3.8 PU (31% of baseline) within 30 seconds in all mice. Cortical thickness in the tibia affects  
240 the depth into the marrow space that LDF can measure. Another study quantified this relationship  
241 in the murine tibia and found that small variations in cortical thickness had minimal effect on LDF  
242 perfusion measurements [28], suggesting that LDF can be used to track longitudinal changes in  
243 bone perfusion. Because cortical thickness in the tibial diaphysis changes by ~10% from skeletal  
244 maturity at 16 weeks of age to 52 weeks of age [39], and can differ by sex [40], longitudinal LDF  
245 measurements should only be performed in age- and sex-matched subjects. Finally, we found no  
246 interaction effect of daily treadmill exercise on LDF readings. Taken together, these results suggest  
247 that the minimally invasive LDF procedure validated in our study can be used to monitor and  
248 compare blood perfusion longitudinally in murine studies involving exercise therapy. This

249 procedure can be used to track changes to osteovascular function, which is known to play an  
250 important role in bone development, remodeling, and repair [41,42], yet remains under-studied.

251 In addition to providing aerobic exercise, treadmill activity also mechanically loads the bones  
252 and increases the functional strain experienced by the bones [43–45]. Even slight changes to  
253 functional strain can affect osteogenesis [32,46] and angiogenesis [15,47]. Since other studies have  
254 shown that changes to gait kinematics and limb patterning affect bone strain [44,48], we were  
255 concerned the LDF procedure could affect locomotion patterns and confound exercise effects by  
256 altering functional strain. We found no differences in duty cycle or interlimb coordination between  
257 weekly and endpoint-only groups at any timepoint, indicating that weekly LDF measurements do  
258 not alter gait patterns (and thus functional strain) during treadmill exercise.

259 Although not the main focus of this study, aerobic treadmill exercise was anticipated to cause  
260 increased tibial perfusion over time due to vascular growth and adaptation, as we have previously  
261 found in studies using the same exercise regimen and LDF technique [29,30]. Perfusion is a  
262 functional measure of not only the amount and direction of blood flow but also vascular  
263 permeability and capillary density [24]. Treadmill exercise may be affecting the size, number, or  
264 cellular makeup of the vasculature without causing changes in perfusion. Rats that performed a  
265 similar treadmill routine for two weeks had a 19% increase in the number but not total area of  
266 blood vessels in the proximal tibial metaphysis compared to the sedentary group [15]. A more  
267 rigorous aerobic exercise intervention, such as free access to running wheels where mice will run  
268 4-10 km daily [49,50], may have a larger and more detectible effect on perfusion. Nevertheless,  
269 our study confirmed that weekly LDF procedures will not confound perfusion measurements in  
270 future exercise studies.

271 Stress, like inflammation and aerobic exercise, can also affect vascular function.  
272 Neuropeptide Y, which is expressed during stress response, has been shown to be both angiogenic  
273 and vasoconstrictive, which could increase blood pressure and the amount of vasculature in bone  
274 [51]. Although we found no detectible increases in IL-6 or visible signs of inflammation at the  
275 incision site, both sedentary and exercise mice had a significant increase in tibial perfusion in the  
276 third week that was resolved by the fourth week. Stress may have played a role in increasing  
277 perfusion in the third week; all mice were handled daily for either treadmill exercise or the  
278 sedentary treadmill activity and had blood drawn weekly which could induce a stress response.  
279 The increased perfusion lasted only one week and was present in both exercise and sedentary mice.

280 This study had several limitations that warrant attention in future studies. A primary  
281 concern of this technique is the removal of a small area of the periosteum, a highly vascularized  
282 tissue that contains osteoblast precursor cells [52]. LDF measures of intracortical perfusion in the  
283 tibiae of juvenile ewes dropped by 25% immediately following the removal of the periosteum from  
284 the medial aspect [53]. Although the amount of periosteum removed in our procedure is small  
285 (about the size of our probe, 0.5 mm<sup>2</sup> area), the effects of periosteal removal were not examined  
286 and may affect bone tissue function. The effects of weekly LDF procedures on bone remodeling  
287 and homeostasis were not examined in this study. This study did not compare LDF results to other  
288 promising emerging techniques for examining osteovasculature *in vivo*. Several new higher  
289 resolution PET scans can be used in rodent bones [54], and emerging MRI techniques (e.g., blood  
290 oxygen level-dependent MRI and intravoxel incoherent motion MRI [24]) greatly improve  
291 resolution and do not require contrast agents, but these techniques remain prohibitively expensive.

292

## 293 **5. Conclusions**

294 Weekly LDF procedures performed over four weeks did not induce measurable signs of  
295 inflammation or significantly alter gait patterns during treadmill exercise. Unlike other existing  
296 methods used for measuring the vascular network in bone, this procedure can be performed *in vivo*,  
297 is repeatable without confounding study controls, is relatively simple to perform, and is  
298 inexpensive. Monitoring intraosseous perfusion serially with LDF provides a functional measure  
299 of blood flow, enabling researchers to track changes to the osteovasculature noninvasively during  
300 disease progression and interventions.

301

## 302 **Acknowledgments**

303 This work was supported by the Eunice Kennedy Shriver National Institute of Child Health and  
304 Human Development (NICHD) of the National Institutes of Health (NIH) under award number  
305 K12HD073945. Additional support was provided by the Office of Undergraduate Research at  
306 North Carolina State University.

307

## 308 **Declaration of interest**

309 None

310

## 311 **Role of the funding source**

312 The funding sources had no involvement in study design; in the collection, analysis, and  
313 interpretation of data; in the writing of the report; or in the decision to submit the article for  
314 publication. The content is solely the responsibility of the authors and does not necessarily  
315 represent the official views of the National Institutes of Health.

316 **References**

- 317 [1] A.M. Parfitt, The mechanism of coupling: a role for the vasculature, *Bone*. 26 (2000) 319–  
318 323. doi:10.1016/S8756-3282(00)80937-0.
- 319 [2] J. Trueta, The Role of the Vessels in Osteogenesis, *Bone Joint J.* 45-B (1963) 402–418.
- 320 [3] R.E. Tomlinson, J.A. McKenzie, A.H. Schmieder, G.R. Wohl, G.M. Lanza, M.J. Silva,  
321 Angiogenesis is Required for Stress Fracture Healing in Rats, *Bone*. 52 (2013) 212–219.  
322 doi:10.1016/j.bone.2012.09.035.
- 323 [4] A.L. Wallace, E.R.C. Draper, R.K. Strachan, I.D. McCarthy, S.P.F. Hughes, The effect of  
324 devascularisation upon early bone healing in dynamic external fixation, *Bone Joint J.* 73  
325 (1991) 819–825.
- 326 [5] M. Naves, M. Rodríguez-García, J.B. Díaz-López, C. Gómez-Alonso, J.B. Cannata-Andía,  
327 Progression of vascular calcifications is associated with greater bone loss and increased  
328 bone fractures, *Osteoporos Int.* 19 (2008) 1161–1166. doi:10.1007/s00198-007-0539-1.
- 329 [6] G.N. Farhat, A.B. Newman, K. Sutton-Tyrrell, K.A. Matthews, R. Boudreau, A.V.  
330 Schwartz, T. Harris, F. Tyllavsky, M. Visser, J.A. Cauley, for the H.A. Study, The  
331 association of bone mineral density measures with incident cardiovascular disease in older  
332 adults, *Osteoporos Int.* 18 (2007) 999–1008. doi:10.1007/s00198-007-0338-8.
- 333 [7] J.F. Griffith, D.K.W. Yeung, G.E. Antonio, F.K.H. Lee, A.W.L. Hong, S.Y.S. Wong,  
334 E.M.C. Lau, P.C. Leung, Vertebral Bone Mineral Density, Marrow Perfusion, and Fat  
335 Content in Healthy Men and Men with Osteoporosis: Dynamic Contrast-enhanced MR  
336 Imaging and MR Spectroscopy, *Radiology*. 236 (2005) 945–951.  
337 doi:10.1148/radiol.2363041425.

- 338 [8] J.F. Griffith, D.K. Yeung, P.H. Tsang, K.C. Choi, T.C. Kwok, A.T. Ahuja, K.S. Leung,  
339 P.C. Leung, Compromised Bone Marrow Perfusion in Osteoporosis, *J Bone Miner Res.* 23  
340 (2008) 1068–1075. doi:10.1359/jbmr.080233.
- 341 [9] L.A. Whiteside, P.A. Lesker, D.J. Simmons, Measurement of Regional Bone and Bone  
342 Marrow Blood Flow in the Rabbit Using the Hydrogen Washout Technique, *Clin. Orthop.*  
343 *Relat. Res.* 122 (1977) 340–346.
- 344 [10] M.A. Serrat, Measuring bone blood supply in mice using fluorescent microspheres, *Nat.*  
345 *Protoc.* 4 (2009) 1779–58. doi:http://dx.doi.org/10.1038/nprot.2009.190.
- 346 [11] O. Grundnes, O. Reikerås, Blood flow and mechanical properties of healing bone, *Acta*  
347 *Orthop. Scand.* 63 (1992) 487–491. doi:10.3109/17453679209154720.
- 348 [12] J. Reeve, M. Arlot, R. Wootton, C. Edouard, M. Tellez, R. Hesp, J.R. Green, P.J. Meunier,  
349 Skeletal Blood Flow, Iliac Histomorphometry, and Strontium Kinetics in Osteoporosis: A  
350 Relationship Between Blood Flow and Corrected Apposition Rate, *J. Clin. Endocrin. &*  
351 *Metab.* 66 (1988) 1124–1131. doi:10.1210/jcem-66-6-1124.
- 352 [13] G. Kerckhofs, S. Stegen, N. van Gastel, A. Sap, G. Falgayrac, G. Penel, M. Durand, F.P.  
353 Luyten, L. Geris, K. Vandamme, T. Parac-Vogt, G. Carmeliet, Simultaneous three-  
354 dimensional visualization of mineralized and soft skeletal tissues by a novel microCT  
355 contrast agent with polyoxometalate structure, *BIomater.* 159 (2018) 1–12.  
356 doi:10.1016/j.biomaterials.2017.12.016.
- 357 [14] O. Barou, S. Mekraldi, L. Vico, G. Boivin, C. Alexandre, M.H. Lafage-Proust,  
358 Relationships between trabecular bone remodeling and bone vascularization: a quantitative  
359 study, *Bone.* 30 (2002) 604–612. doi:10.1016/S8756-3282(02)00677-4.

- 360 [15] Z. Yao, M.-H. Lafage-Proust, J. Plouët, S. Bloomfield, C. Alexandre, L. Vico, Increase of  
361 Both Angiogenesis and Bone Mass in Response to Exercise Depends on VEGF, *J Bone*  
362 *Miner Res.* 19 (2004) 1471–1480. doi:10.1359/JBMR.040517.
- 363 [16] J.D. Boerckel, B.A. Uhrig, N.J. Willett, N. Huebsch, R.E. Guldberg, Mechanical regulation  
364 of vascular growth and tissue regeneration in vivo, *Proc. Natl. Acad. Sci. USA.* 108 (2011)  
365 E674–E680. doi:10.1073/pnas.1107019108.
- 366 [17] D. Briers, D.D. Duncan, E.R. Hirst, S.J. Kirkpatrick, M. Larsson, W. Steenbergen, T.  
367 Stromberg, O.B. Thompson, Laser speckle contrast imaging: theoretical and practical  
368 limitations, *J. Biomed. Opt.* 18 (2013) 066018. doi:10.1117/1.JBO.18.6.066018.
- 369 [18] B. Roche, V. David, A. Vanden-Bossche, F. Peyrin, L. Malaval, L. Vico, M.-H. Lafage-  
370 Proust, Structure and quantification of microvascularisation within mouse long bones: What  
371 and how should we measure?, *Bone.* 50 (2012) 390–399. doi:10.1016/j.bone.2011.09.051.
- 372 [19] J.P. Dyke, R.K. Aaron, Noninvasive methods of measuring bone blood perfusion, *Ann.*  
373 *N.Y. Acad. Sci.* 1192 (2009) 95–102. doi:10.1111/j.1749-6632.2009.05376.x.
- 374 [20] J.T. Au, G. Craig, V. Longo, P. Zanzonico, M. Mason, Y. Fong, P.J. Allen, Gold  
375 Nanoparticles Provide Bright Long-Lasting Vascular Contrast for CT Imaging, *Am. J.*  
376 *Roentgenol.* 200 (2013) 1347–1351. doi:10.2214/AJR.12.8933.
- 377 [21] D.P. Clark, K. Ghaghada, E.J. Moding, D.G. Kirsch, C.T. Badea, In vivo characterization  
378 of tumor vasculature using iodine and gold nanoparticles and dual energy micro-CT, *Phys.*  
379 *Med. Biol.* 58 (2013) 1683. doi:10.1088/0031-9155/58/6/1683.
- 380 [22] G.E. Nilsson, T. Tenland, P.A. Oberg, Evaluation of a Laser Doppler Flowmeter for  
381 Measurement of Tissue Blood Flow, *IEEE T. Biomed. Eng.* BME-27 (1980) 597–604.  
382 doi:10.1109/TBME.1980.326582.



- 383 [23] M.F. Swiontkowski, Laser Doppler Flowmetry—Development and Clinical Application,  
384 Iowa Orthop. J. 11 (1991) 119–126.
- 385 [24] J.F. Griffith, Imaging vasculature of bone, Journal of Orthopaedic Translation. 4 (2014)  
386 192. doi:10.1016/j.jot.2014.07.106.
- 387 [25] S. Hellem, L.S. Jacobsson, G.E. Nilsson, D.H. Lewis, Measurement of microvascular blood  
388 flow in cancellous bone using laser Doppler flowmetry and <sup>133</sup>Xe-clearance, Int. J. Oral  
389 Surg. 12 (1983) 165–177. doi:10.1016/S0300-9785(83)80063-5.
- 390 [26] P. Okunieff, X. Wang, P. Rubin, J.N. Finkelstein, L.S. Constine, I. Ding, Radiation-induced  
391 changes in bone perfusion and angiogenesis, Int. J. Radiat. Oncol. 42 (1998) 885–889.  
392 doi:10.1016/S0360-3016(98)00339-3.
- 393 [27] M. Melnyk, T. Henke, L. Claes, P. Augat, Revascularisation during fracture healing with  
394 soft tissue injury, Arch Orthop Trauma Surg. 128 (2008) 1159–1165. doi:10.1007/s00402-  
395 007-0543-0.
- 396 [28] B. Roche, A. Vanden-Bossche, M. Normand, L. Malaval, L. Vico, M.-H. Lafage-Proust,  
397 Validated Laser Doppler protocol for measurement of mouse bone blood perfusion —  
398 Response to age or ovariectomy differs with genetic background, Bone. 55 (2013) 418–426.  
399 doi:10.1016/j.bone.2013.03.022.
- 400 [29] N.J. Hanne, A.J. Steward, E.D. Easter, S.V. Pinnamaraju, J.H. Jacqueline H, Diet-Induced  
401 Obesity Deteriorates Cancellous Bone Structure Despite Increased Blood Perfusion,  
402 Orthopaedic Research Society Annual Meeting, San Diego, CA, March 19-22, 2017. Poster  
403 #1699.

- 404 [30] N.J. Hanne, A.J. Steward, S.V. Pinnamaraju, S.D. Teeter, J.H. Cole, Exercise Therapy  
405 Mitigates Reductions in Tibial Blood Flow during Acute Stroke Recovery, Orthopaedic  
406 Research Society Annual Meeting, San Diego, CA, March 19-22, 2017. Paper #0337.
- 407 [31] M.T. Goova, J. Li, T. Kislinger, W. Qu, et al, Blockade of receptor for advanced glycation  
408 end-products restores effective wound healing in diabetic mice, *Am. J. Pathol.* 159 (2001)  
409 513–25.
- 410 [32] H.M. Frost, Bone's Mechanostat: A 2003 Update, *Anat. Rec.* 275A (2003) 1081–1101.  
411 doi:10.1002/ar.a.10119.
- 412 [33] H. Leblond, M. L'Espérance, D. Orsal, S. Rossignol, Treadmill Locomotion in the Intact  
413 and Spinal Mouse, *J. Neurosci.* 23 (2003) 11411–11419.
- 414 [34] A.D. Kloos, L.C. Fisher, M.R. Detloff, D.L. Hassenzahl, D.M. Basso, Stepwise motor and  
415 all-or-none sensory recovery is associated with nonlinear sparing after incremental spinal  
416 cord injury in rats, *Experimental Neurology.* 191 (2005) 251–265.  
417 doi:10.1016/j.expneurol.2004.09.016.
- 418 [35] E. Redondo-Castro, A. Torres-Espín, G. García-Álías, X. Navarro, Quantitative assessment  
419 of locomotion and interlimb coordination in rats after different spinal cord injuries, *J.*  
420 *Neurosci. Methods.* 213 (2013) 165–178. doi:10.1016/j.jneumeth.2012.12.024.
- 421 [36] S. Amar, Q. Zhou, Y. Shaik-Dasthagirisahab, S. Leeman, Diet-Induced Obesity in Mice  
422 Causes Changes in Immune Responses and Bone Loss Manifested by Bacterial Challenge,  
423 *Proceedings of the National Academy of Sciences of the United States of America.* 104  
424 (2007) 20466–20471.
- 425 [37] M. da S. Krause, A. Bittencourt, P.I.H. de Bittencourt, N.H. McClenaghan, P.R. Flatt, C.  
426 Murphy, P. Newsholme, Physiological concentrations of interleukin-6 directly promote

- 427 insulin secretion, signal transduction, nitric oxide release, and redox status in a clonal  
428 pancreatic  $\beta$ -cell line and mouse islets, *Journal of Endocrinology*. 214 (2012) 301–311.  
429 doi:10.1530/JOE-12-0223.
- 430 [38] K.T. Keylock, V.J. Vieira, M.A. Wallig, L.A. DiPietro, M. Schrementi, J.A. Woods,  
431 Exercise accelerates cutaneous wound healing and decreases wound inflammation in aged  
432 mice, *A. J. Physiol.-Reg. I*. 294 (2008) R179–R184. doi:10.1152/ajpregu.00177.2007.
- 433 [39] V.L. Ferguson, R.A. Ayers, T.A. Bateman, S.J. Simske, Bone development and age-related  
434 bone loss in male C57BL/6J mice, *Bone*. 33 (2003) 387–398. doi:10.1016/S8756-  
435 3282(03)00199-6.
- 436 [40] J.M. Somerville, R.M. Aspden, K.E. Armour, K.J. Armour, D.M. Reid, Growth of  
437 C57BL/6 mice and the material and mechanical properties of cortical bone from the tibia,  
438 *Calcif. Tissue Int.* 74 (2004) 469–475. doi:10.1007/s00223-003-0101-x.
- 439 [41] S.C. Marks, P.R. Odgren, Chapter 1 - Structure and Development of the Skeleton, in: J.P.  
440 Bilezikian, L.G. Raisz, G.A. Rodan (Eds.), *Principles of Bone Biology (Second Edition)*,  
441 Academic Press, San Diego, 2002: pp. 3–15. doi:10.1016/B978-012098652-1.50103-7.
- 442 [42] H.-P. Gerber, T.H. Vu, A.M. Ryan, J. Kowalski, Z. Werb, N. Ferrara, VEGF couples  
443 hypertrophic cartilage remodeling, ossification and angiogenesis during endochondral bone  
444 formation, *Nat Med*. 5 (1999) 623–628. doi:10.1038/9467.
- 445 [43] J.M. Wallace, R.M. Rajachar, M.R. Allen, S.A. Bloomfield, P.G. Robey, M.F. Young, D.H.  
446 Kohn, Exercise-induced changes in the cortical bone of growing mice are bone- and  
447 gender-specific, *Bone*. 40 (2007) 1120–1127. doi:10.1016/j.bone.2006.12.002.

- 448 [44] J. Prasad, B.P. Wiater, S.E. Nork, S.D. Bain, T.S. Gross, Characterizing gait induced  
449 normal strains in a murine tibia cortical bone defect model, *J. Biomech.* 43 (2010) 2765–  
450 2770. doi:10.1016/j.jbiomech.2010.06.030.
- 451 [45] A.G. Berman, M.J. Hinton, J.M. Wallace, Treadmill running and targeted tibial loading  
452 differentially improve bone mass in mice, *Bone Rep.* 10 (2019).  
453 doi:10.1016/j.bonr.2019.100195.
- 454 [46] R. Ellman, J. Spatz, A. Cloutier, R. Palme, B.A. Christiansen, M.L. Bouxsein, Partial  
455 reductions in mechanical loading yield proportional changes in bone density, bone  
456 architecture, and muscle mass, *J. Bone. Miner. Res.* 28 (2013) 875–885.  
457 doi:10.1002/jbmr.1814.
- 458 [47] A.J. Steward, J.H. Cole, F.S. Ligler, E. Lobo, Mechanical and Vascular Cues  
459 Synergistically Enhance Osteogenesis in Human Mesenchymal Stem Cells, *Tissue Eng.*  
460 Part A. (2016). doi:10.1089/ten.TEA.2015.0533.
- 461 [48] D.E. Hurwitz, D.R. Sumner, T.P. Andriacchi, D.A. Sugar, Dynamic knee loads during gait  
462 predict proximal tibial bone distribution, *J. Biomech.* 31 (1998) 423–430.  
463 doi:10.1016/S0021-9290(98)00028-1.
- 464 [49] K. Gertz, J. Priller, G. Kronenberg, K.B. Fink, B. Winter, H. Schröck, S. Ji, M. Milosevic,  
465 C. Harms, M. Böhm, U. Dirnagl, U. Laufs, M. Endres, Physical Activity Improves Long-  
466 Term Stroke Outcome via Endothelial Nitric Oxide Synthase–Dependent Augmentation of  
467 Neovascularization and Cerebral Blood Flow, *Circ. Res.* 99 (2006) 1132–1140.  
468 doi:10.1161/01.RES.0000250175.14861.77.
- 469 [50] M. Styner, G.M. Pagnotti, C. McGrath, X. Wu, B. Sen, G. Uzer, Z. Xie, X. Zong, M.A.  
470 Styner, C.T. Rubin, J. Rubin, Exercise Decreases Marrow Adipose Tissue Through  $\beta$ -

- 471 Oxidation in Obese Running Mice, *J Bone Miner Res.* 32 (2017) 1692–1702.  
472 doi:10.1002/jbmr.3159.
- 473 [51] L.E. Kuo, Z. Zukowska, Stress, NPY and vascular remodeling: Implications for stress-  
474 related diseases, *Peptides.* 28 (2007) 435–440. doi:10.1016/j.peptides.2006.08.035.
- 475 [52] C. Colnot, X. Zhang, M.L.K. Tate, Current insights on the regenerative potential of the  
476 periosteum: Molecular, cellular, and endogenous engineering approaches, *J. Orthop. Res.*  
477 30 (2012) 1869–1878. doi:10.1002/jor.22181.
- 478 [53] M.J. Kowalski, E.H. Schemitsch, P.J. Kregor, D. Senft, M.F. Swiontkowski, Effect of  
479 periosteal stripping on cortical bone perfusion: A laser doppler study in sheep, *Calcif.*  
480 *Tissue Int.* 59 (1996) 24–26. doi:10.1007/s002239900080.
- 481 [54] R.E. Tomlinson, M.J. Silva, K.I. Shoghi, Quantification of Skeletal Blood Flow and  
482 Fluoride Metabolism in Rats using PET in a Pre-Clinical Stress Fracture Model, *Mol.*  
483 *Imaging Biol.* 14 (2012) 348–354. doi:10.1007/s11307-011-0505-3.
